# Supplementary material for: The Pitfalls of Heterosis Coefficients
Source: MDPI journal article supplement (doi:10.3390/plants9070875), 2020-07-09
Supplement: s1 [file s1]

| Reference   | Coefficient                                              | Coefficient as function of genetic effects                                                               |
|-------------|----------------------------------------------------------|----------------------------------------------------------------------------------------------------------|
| Mid-parent  | $H_{\text{mp}} = z_{12} - \bar{z}$                       | $\sum d + \sum e_{\text{dom}} - \sum e_{\text{add even}}$                                                |
|             | $H_{\text{MP}} = \frac{z_{12} - \bar{z}}{\bar{z}}$       | $\frac{\sum d + \sum e_{\text{dom}} - \sum e_{\text{add even}}}{\mu + \sum e_{\text{add even}}}$         |
|             | $H_{\text{PR}} = \frac{z_{12} - \bar{z}}{(z_2 - z_1)/2}$ | $\frac{\sum d + \sum e_{\text{dom}} - \sum e_{\text{add even}}}{\sum a + \sum e_{\text{add odd}}}$       |
| Best-parent | $H_{\text{bp}} = z_{12} - z_2$                           | $\sum d + \sum e_{\text{dom}} - \sum a - \sum e_{\text{add}}$                                            |
|             | $H_{\text{BP}} = \frac{z_{12} - z_2}{z_2}$               | $\frac{\sum d + \sum e_{\text{dom}} - \sum a - \sum e_{\text{add}}}{\mu + \sum a + \sum e_{\text{add}}}$ |
