# Supplementary material for: The Pitfalls of Heterosis Coefficients
Source: MDPI journal article supplement (doi:10.3390/plants9070875), 2020-07-09
Supplement: s1 [file s1]

Commentary

# The Pitfalls of Heterosis Coefficients: Supplementary Materials

Dominique de Vienne \* and Julie B. Fiévet

GQE—Le Moulon, INRAE, Université Paris-Saclay, CNRS, AgroParisTech, 91190 Gif-sur-Yvette, France; julie.fievet@inrae.fr

\* Correspondence: dominique.de-vienne@inrae.fr; Tel.: +33-1-69332360

Received: 29 May 2020; Accepted: 4 July 2020; Published: date

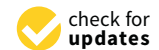

Table S1

**Heterosis coefficients expressed as functions of genetic effects.** Subscripts: same as in Table 1.  $\mu$ , mean of the multilocus homozygous genotypes;  $\sum a$ , sum of the additive effects;  $\sum d$ , sum of the dominance effects;  $\sum e_{\text{dom}}$ , sum of the dominance-by-dominance epistatic effects;  $\sum e_{\text{add}}$ , sum of the additive-by-additive epistatic effects;  $\sum e_{\text{add even}}$ , sum of the additive-by-additive epistatic effects involving an even number of genes;  $\sum e_{\text{add odd}}$ , sum of the additive-by-additive epistatic effects involving an odd number of genes (from [13]).

| Reference   | Coefficient                                              | Coefficient as function of genetic effects                                                               |
|-------------|----------------------------------------------------------|----------------------------------------------------------------------------------------------------------|
| Mid-parent  | $H_{\text{mp}} = z_{12} - \bar{z}$                       | $\sum d + \sum e_{\text{dom}} - \sum e_{\text{add even}}$                                                |
|             | $H_{\text{MP}} = \frac{z_{12} - \bar{z}}{\bar{z}}$       | $\frac{\sum d + \sum e_{\text{dom}} - \sum e_{\text{add even}}}{\mu + \sum e_{\text{add even}}}$         |
|             | $H_{\text{PR}} = \frac{z_{12} - \bar{z}}{(z_2 - z_1)/2}$ | $\frac{\sum d + \sum e_{\text{dom}} - \sum e_{\text{add even}}}{\sum a + \sum e_{\text{add odd}}}$       |
| Best-parent | $H_{\text{bp}} = z_{12} - z_2$                           | $\sum d + \sum e_{\text{dom}} - \sum a - \sum e_{\text{add}}$                                            |
|             | $H_{\text{BP}} = \frac{z_{12} - z_2}{z_2}$               | $\frac{\sum d + \sum e_{\text{dom}} - \sum a - \sum e_{\text{add}}}{\mu + \sum a + \sum e_{\text{add}}}$ |

Figure S1

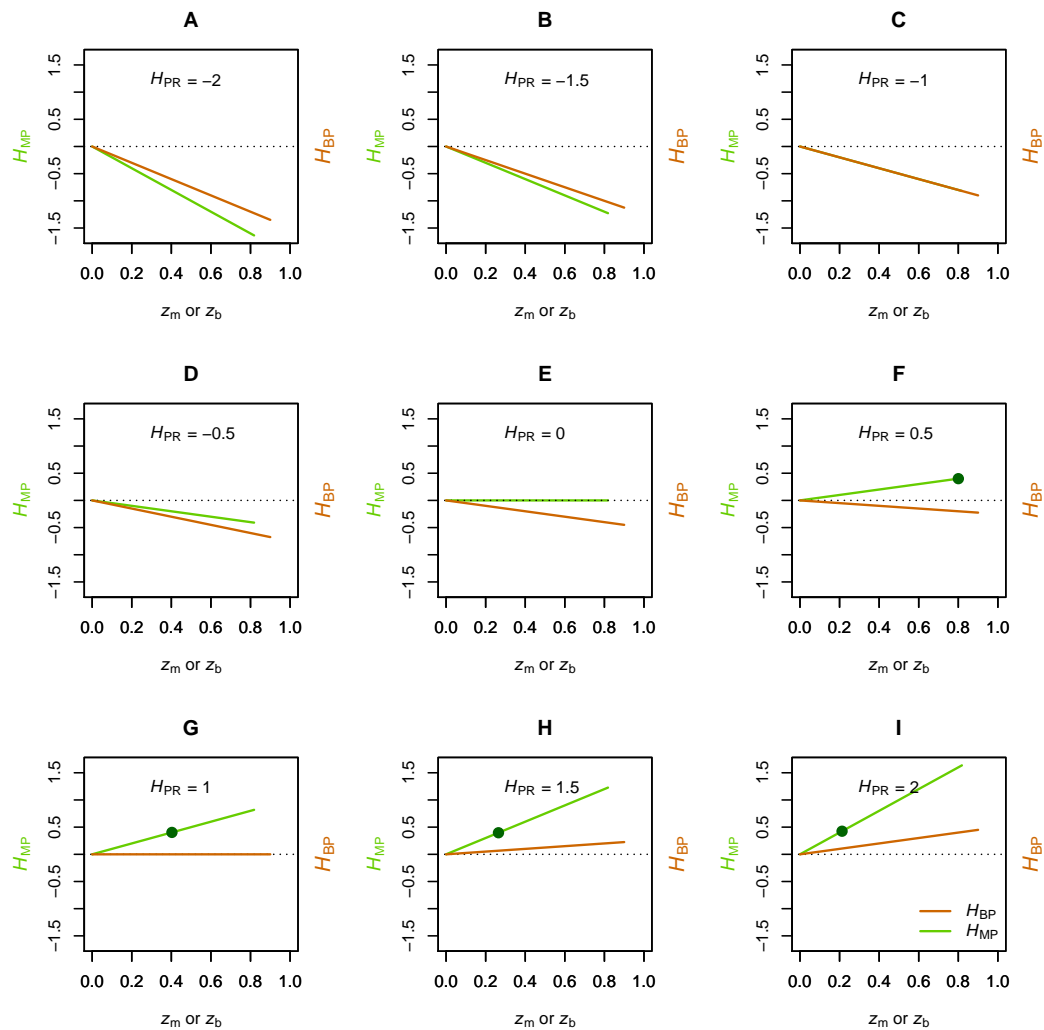

**Influence of the scale of the parental values on  $H_{MP}$  and  $H_{BP}$  for different values of the potency ratio  $H_{PR}$ .** (A) to (I)  $H_{PR}$  values from  $-2$  to  $2$ .  $z_m = \frac{z_2 - z_1}{z_1 + z_2}$  and  $z_b = \frac{z_2 - x_1}{z_2}$ , with  $z_1 = 1$  and  $z_2$  varying from  $1$  to  $10$  (see Equations (1) and (2) in the text). Green line: relationship between  $z_m$  and  $H_{MP}$ . Orange line: relationship between  $z_b$  and  $H_{BP}$ . Dotted line:  $H_{MP}$  or  $H_{BP} = 0$ . The dark green points show that a given  $H_{MP}$  value ( $\approx 0.4$ ) can be observed for very different  $H_{PR}$  values, and the same is true for  $H_{BP}$ .

Figure S2

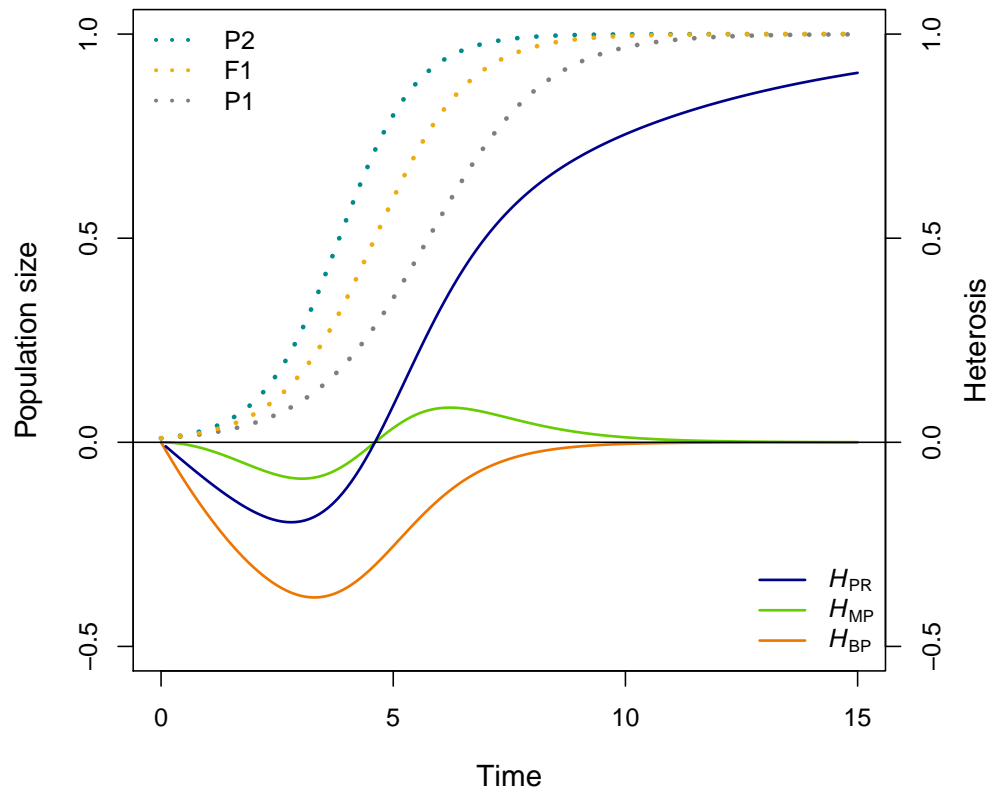

**Heterosis for population size (simulations).** Population sizes (dotted curves) follow over time a logistic function with  $K = 1$  and  $a = 100$  (see text). Parents P1 and P2 and hybrid F1 have respectively growth rates  $r = 0.8$ ,  $r = 1.2$  and  $r = 1$  (i.e., this parameter is considered to be additive). Solid curves: profiles of heterosis coefficients (right scale).

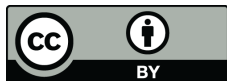

© 2020 by the authors. Licensee MDPI, Basel, Switzerland. This article is an open access article distributed under the terms and conditions of the Creative Commons Attribution (CC BY) license (<http://creativecommons.org/licenses/by/4.0/>).
