# Supplementary figures and images for: The Pitfalls of Heterosis Coefficients
Source: MDPI journal article supplement (doi:10.3390/plants9070875), 2020-07-09

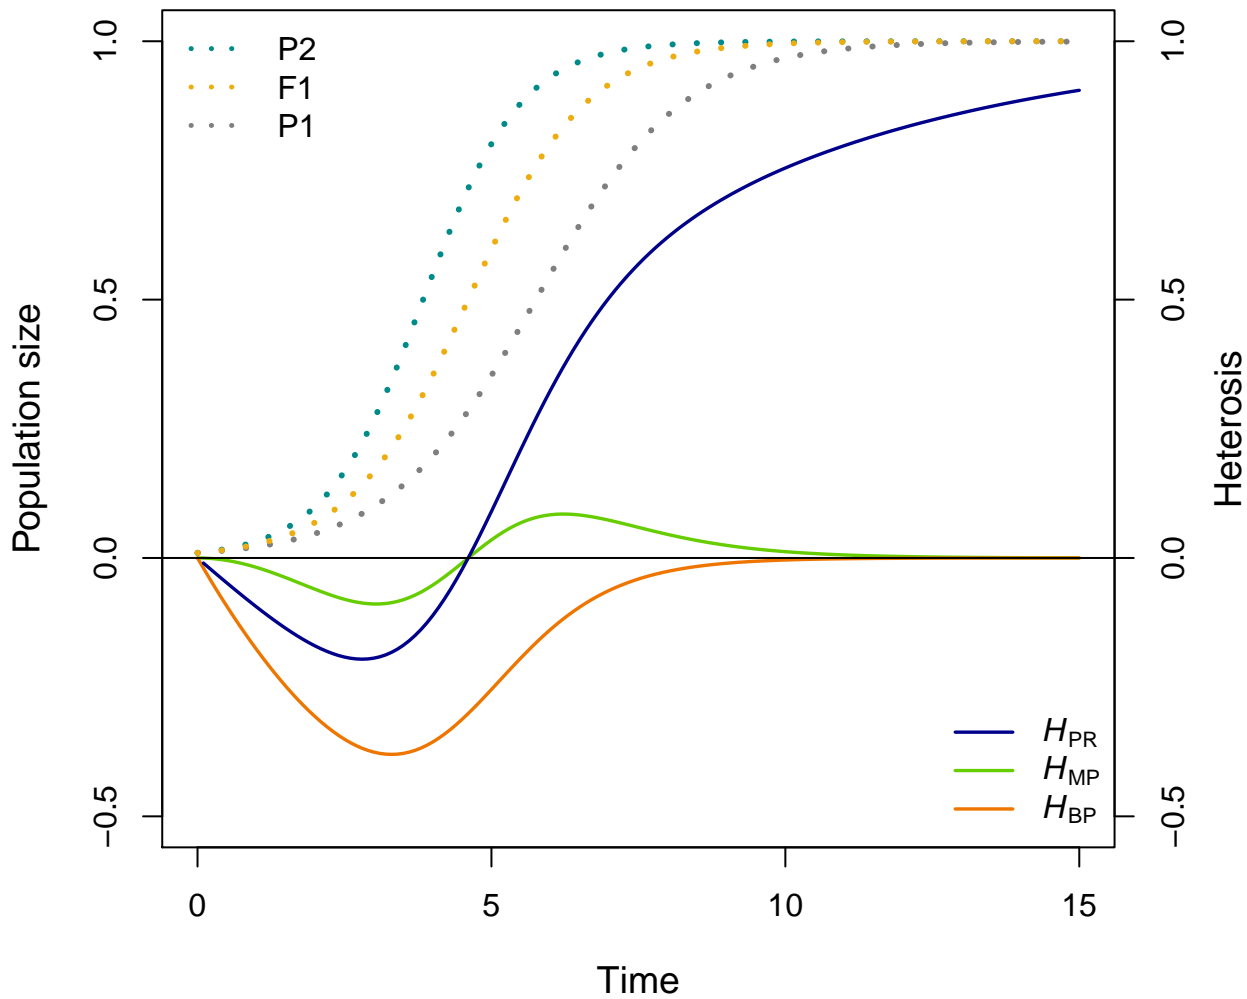

Supplement: s1 [file s1]

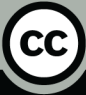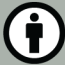

BY

Supplement: s1 [file s1]

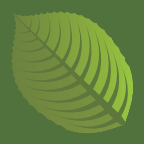

*plants*

Supplement: s1 [file s1]

**A**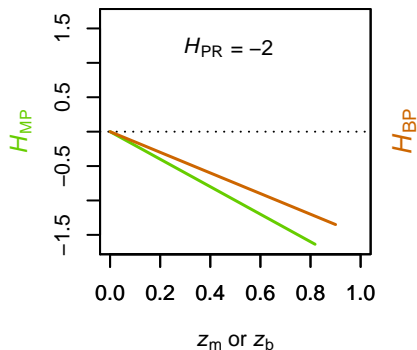**B**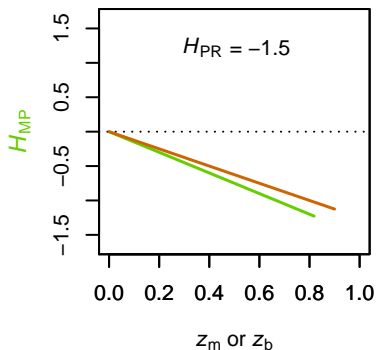**C**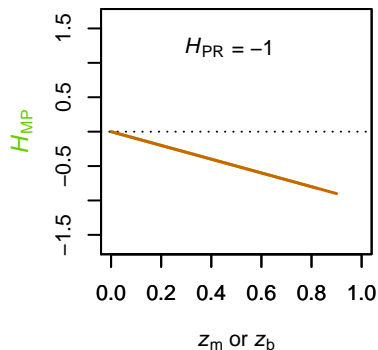**D**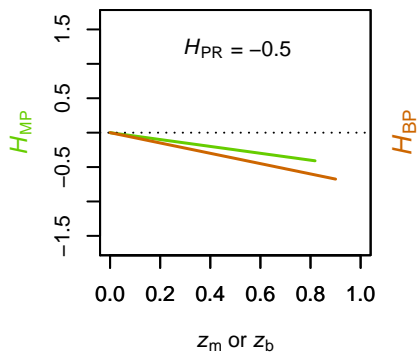**E**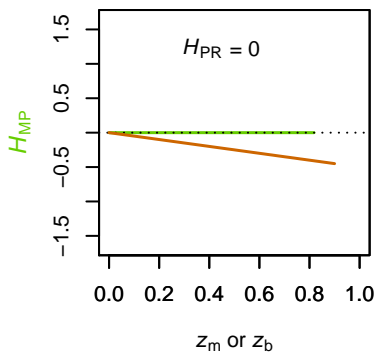**F**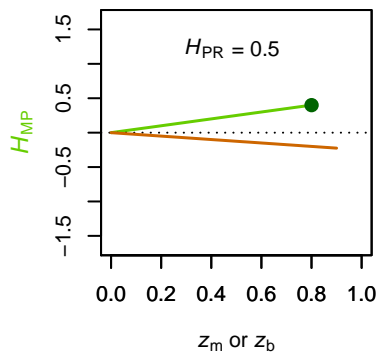**G**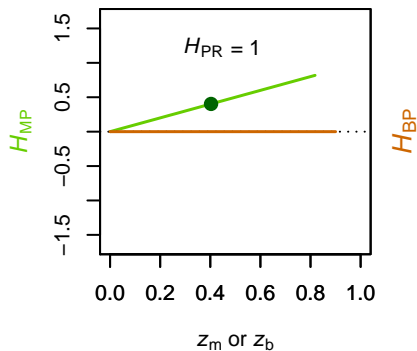**H**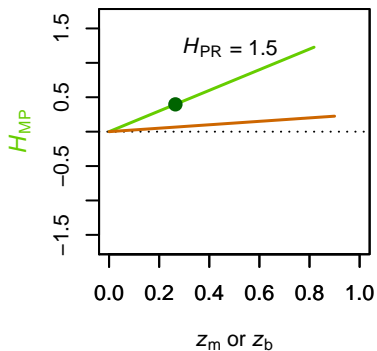**I**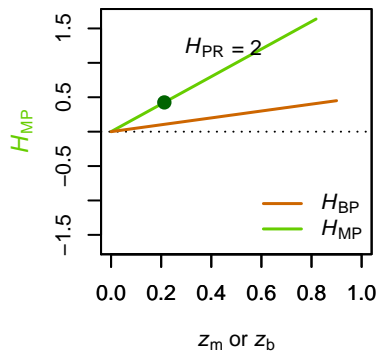

Supplement: s1 [file s1]
